# Supplementary material for: Biological nitrification inhibition by root exudates of native species, Hibiscus splendens and Solanum echinatum
Source: PeerJ. 2018 Jun 19;6:e4960. doi: 10.7717/peerj.4960 (PMC6014310; doi:10.7717/peerj.4960)
Supplement: Supplemental Information 1 — Recorded measurements of NO2-N and NOx to determine the level of nitrification activity. Measurements were taken over 0–24 h. [file peerj-06-4960-s001.xlsx]

## Sheet: Sheet1
							Sample ID	ppm as NO2-N	ppm as NOx-N	ppm as NO3-N
		Species	Replicate	Weeks	Inc. time			0.03-12ppm	0.03-12ppm
1	P1R1	P1	R1	W2	0	HR	CS 001	0.0473	11.9	11.8527
2	P1R2	P1	R2	W2	0	HR	CS 002	0.0499	12.1	12.0501
3	P1R3	P1	R3	W2	0	HR	CS 003	0.0553	12.2	12.1447
82	P1R1	P1	R1	W2	22	HR	CS 082	0.0933	12.7	12.6067
83	P1R2	P1	R2	W2	22	HR	CS 083	0.0726	13	12.9274
84	P1R3	P1	R3	W2	22	HR	CS 084	0.056	12.8	12.744
10	P1R1	P1	R1	W4	0	HR	CS 010	0.0601	11.9	11.8399
11	P1R2	P1	R2	W4	0	HR	CS 011	0.0331	12.3	12.2669
12	P1R3	P1	R3	W4	0	HR	CS 012	0.0486	12.3	12.2514
91	P1R1	P1	R1	W4	22	HR	CS 091	0.0916	12.9	12.8084
92	P1R2	P1	R2	W4	22	HR	CS 092	0.0803	12.9	12.8197
93	P1R3	P1	R3	W4	22	HR	CS 093	0.13	12.7	12.57
19	P1R1	P1	R1	W6	0	HR	CS 019	0.0447	11.6	11.5553
20	P1R2	P1	R2	W6	0	HR	CS 020	0.0646	11.6	11.5354
21	P1R3	P1	R3	W6	0	HR	CS 021	0.078	12.1	12.022
100	P1R1	P1	R1	W6	22	HR	CS 100	0.108	12.4	12.292
101	P1R2	P1	R2	W6	22	HR	CS 101	0.141	12.4	12.259
102	P1R3	P1	R3	W6	22	HR	CS 102	0.0446	12.4	12.3554
4	P3R1	P3	R1	W2	0	HR	CS 004	0.0477	12	11.9523
5	P3R2	P3	R2	W2	0	HR	CS 005	0.0506	12.2	12.1494
6	P3R3	P3	R3	W2	0	HR	CS 006	0.0533	12.2	12.1467
85	P3R1	P3	R1	W2	22	HR	CS 085	0.0853	12.7	12.6147
86	P3R2	P3	R2	W2	22	HR	CS 086	0.0688	13.2	13.1312
87	P3R3	P3	R3	W2	22	HR	CS 087	0.0465	12.6	12.5535
13	P3R1	P3	R1	W4	0	HR	CS 013	0.0477	12	11.9523
14	P3R2	P3	R2	W4	0	HR	CS 014	0.0506	12.2	12.1494
15	P3R3	P3	R3	W4	0	HR	CS 015	0.0533	12.2	12.1467
94	P3R1	P3	R1	W4	22	HR	CS 094	0.0853	12.7	12.6147
95	P3R2	P3	R2	W4	22	HR	CS 095	0.0688	13.2	13.1312
96	P3R3	P3	R3	W4	22	HR	CS 096	0.0465	12.6	12.5535
22	P3R1	P3	R1	W6	0	HR	CS 022	0.0738	11.3	11.2262
23	P3R2	P3	R2	W6	0	HR	CS 023	0.11	12.2	12.09
24	P3R3	P3	R3	W6	0	HR	CS 024	0.0627	11.6	11.5373
103	P3R1	P3	R1	W6	22	HR	CS 103	0.089	12.5	12.411
104	P3R2	P3	R2	W6	22	HR	CS 104	0.0845	12.7	12.6155
105	P3R3	P3	R3	W6	22	HR	CS 105	0.082	12.3	12.218
7	P5R1	P5	R1	W2	0	HR	CS 007	0.0555	11.6	11.5445
8	P5R2	P5	R2	W2	0	HR	CS 008	0.0567	11.6	11.5433
9	P5R3	P5	R3	W2	0	HR	CS 009	0.0623	12.8	12.7377
88	P5R1	P5	R1	W2	22	HR	CS 088	0.0781	12.9	12.8219
89	P5R2	P5	R2	W2	22	HR	CS 089	0.186	12.3	12.114
90	P5R3	P5	R3	W2	22	HR	CS 090	0.125	12.5	12.375
16	P5R1	P5	R1	W4	0	HR	CS 016	0.0476	12.2	12.1524
17	P5R2	P5	R2	W4	0	HR	CS 017	0.0398	11.6	11.5602
18	P5R3	P5	R3	W4	0	HR	CS 018	0.0517	11.8	11.7483
97	P5R1	P5	R1	W4	22	HR	CS 097	0.145	12.4	12.255
98	P5R2	P5	R2	W4	22	HR	CS 098	0.124	12.2	12.076
99	P5R3	P5	R3	W4	22	HR	CS 099	0.136	12.8	12.664
25	P5R1	P5	R1	W6	0	HR	CS 025	0.0713	12.3	12.2287
26	P5R2	P5	R2	W6	0	HR	CS 026	0.0848	11.7	11.6152
27	P5R3	P5	R3	W6	0	HR	CS 027	0.0555	12.1	12.0445
106	P5R1	P5	R1	W6	22	HR	CS 106	0.138	12.1	11.962
107	P5R2	P5	R2	W6	22	HR	CS 107	0.106	12.1	11.994
108	P5R3	P5	R3	W6	22	HR	CS 108	0.159	12.1	11.941
